# Supplementary material for: Rice Bran Supplementation Ameliorates Gut Dysbiosis and Muscle Atrophy in Ovariectomized Mice Fed with a High-Fat Diet
Source: MDPI journal article supplement (doi:10.3390/nu15163514), 2023-08-09
Supplement: s1 [file nutrients-2521427-supplementary.pdf › nutrients-2521427-supplementary.pdf]

Table S1 Nutrients composition of experimental diets

| Ingredient                | Sham  | OC    | OH    | OR    | OHR   |
|---------------------------|-------|-------|-------|-------|-------|
|                           | g/kg  | g/kg  | g/kg  | g/kg  | g/kg  |
| Rice bran <sup>1</sup>    | 0     | 0     | 0     | 100   | 100   |
| Maltodextrin              | 155   | 155   | 155   | 155   | 155   |
| Sucrose                   | 100   | 100   | 100   | 89.9  | 89.9  |
| Casein                    | 140   | 140   | 140   | 121.5 | 121.5 |
| L-Cysetine                | 2     | 2     | 2     | 2     | 2     |
| Fresh soybean oil         | 40    | 40    | 104   | 30.3  | 94.3  |
| Lard                      | 0     | 0     | 96    | 0     | 96    |
| Cellulose                 | 50    | 50    | 50    | 15.4  | 15.4  |
| Mineral-MIX <sup>2</sup>  | 35    | 35    | 35    | 22.2  | 22.2  |
| Vitamin-MIX <sup>3</sup>  | 10    | 10    | 10    | 9     | 9     |
| Choline Bitartrate        | 3     | 3     | 3     | 2.75  | 2.75  |
| Tert-butylhydroquinone    | 0.008 | 0.008 | 0.008 | 0.008 | 0.008 |
| % Energy and their source |       |       |       |       |       |
| Protein                   | 14.9% | 14.9% | 12.3% | 14.9% | 12.3% |
| FAT                       | 9.5%  | 9.5%  | 40%   | 9.5%  | 40%   |
| Carbohydrate              | 75.6% | 75.6% | 47.7% | 75.6% | 47.7% |

1. Rice bran contained 2.3% water; 18.5% protein; 10.1% sucrose; 9.7% fat, 12.8% ash; 34.6% dietary fiber. The experimental diet composition had been adjusted according to the nutrients containing in rice bran.

2. AIN 93 M mineral mixture: Calcium Carbonate 35.7%; Monopotassium phosphate 25.0%; Potassium Citrate monohydrate 2.8%; Sodium Chloride 7.4%; Potassium Sulfate 4.66% Magnesium Oxide 2.4%; Ferric Citrate 0.606%; Zinc Carbonate 0.165%; Manganese Carbonate 0.063%; Copper Carbonate 0.03%; Potassium Iodate 0.001%; Sodium Selenate, Anhydrous 0.001025%; Ammonium Molybdate.4H<sub>2</sub>O 0.000795%; Sodium Metasilicate.9H<sub>2</sub>O 0.145%; Chromium Potassium Sulfate.12H<sub>2</sub>O 0.0275%; Lithium Chloride 0.00174%; Boric Acid 0.00815%; Sodium Fluoride 0.00635%; Nickel Carbonate 0.00318%; Ammonium Vanadate 0.00066% Powdered Sugar 20.9806%.

3. AIN 93 M vitamin mixture: Nicotinic Acid 3.00 (mg/g); D-Calcium Pantothenate 1.60(mg/g); Pyridoxine HCl 0.70(mg/g); Thiamine HCl 0.60(mg/g); Riboflavin 0.60(mg/g) Folic Acid 0.20(mg/g); D-Biotin 0.02(mg/g); Vitamin B12 2.50(mg/g); α-Tocopherol Powder 30.00(mg/g); Vitamin A Palmitate (250,000 U/gm) 1.60(mg/g); Vitamin D3 (400,000 U/gm) 0.25(mg/g); Phylloquinone 0.075(mg/g) Powdered Sucrose 959.655(mg/g).

Table S2 Primers used for the quantitative PCR

|               | Forward 5'→3'            | Reverse 5'→3'             |
|---------------|--------------------------|---------------------------|
| IGF-1         | CAATACAGCCAACGGGAAACAG   | AACAAAGCTGGATGCCTGTCA     |
| Atrogin       | AACCGGGAGGCCAGCTAAAGAACA | TGGGCCTACAGAACAGACAGTGC   |
| MuRF1         | CCTTGAGGGCCATTGACTTTG    | TCCCCTCAGAACTCAAGAGGAA    |
| Myog          | AGTGAATGCAACTCCCACAG     | AGTGAATGCAACTCCCACAG      |
| GLUT4         | ATTGCAGCGCCTGAGTCTTT     | GAGGGGGTTCCCCATCCTTA      |
| IL-6          | TCCTACCCCAACTTCCAATGCTC  | TTGGATGGTCTTGGTCCTTAGCC   |
| TNF- $\alpha$ | ATGGCCTCCCTCTCATCAGT     | TTTGCTACGACGTGGGCTAC      |
| Occludin      | ACTGGGTCAGGGAATATCCA     | TCAGCAGCAGCCATGTACTC      |
| ZO-1          | GGCACATCAGCACGATTTCT     | CCACAAAAGAAATCCTTTCACACCT |
| GAPDH         | TGAGCATCTCCCTCACAATTTC   | GTGCAGCGAACTTTATTGATGC    |

IGF-1, Insulin-Like Growth Factor-1; MuRF1, muscle RING-finger protein-1; Myog, muscle-specific gene myogenin; ZO-1, zonula occludens-1.
